# Supplementary material
Source: publisher figshare collection journal article supplement (https://tandf.figshare.com/articles/dataset/_/825539)
Supplement: Supplementary file 1 [file 1]

Archive with 2 entries (2 files):
- tent_a_451789_sup_13323318.pdf
- tent_a_451789_sup_0001.zip
